# Supplementary material for: Deep plasma proteomics identifies and validates an eight-protein biomarker panel that separate benign from malignant tumors in ovarian cancer
Source: Springer Nature journal article supplement (doi:10.1038/s43856-025-00945-0), 2025-06-12
Supplement: MOESM1 [file 43856_2025_945_MOESM1_ESM.pdf]

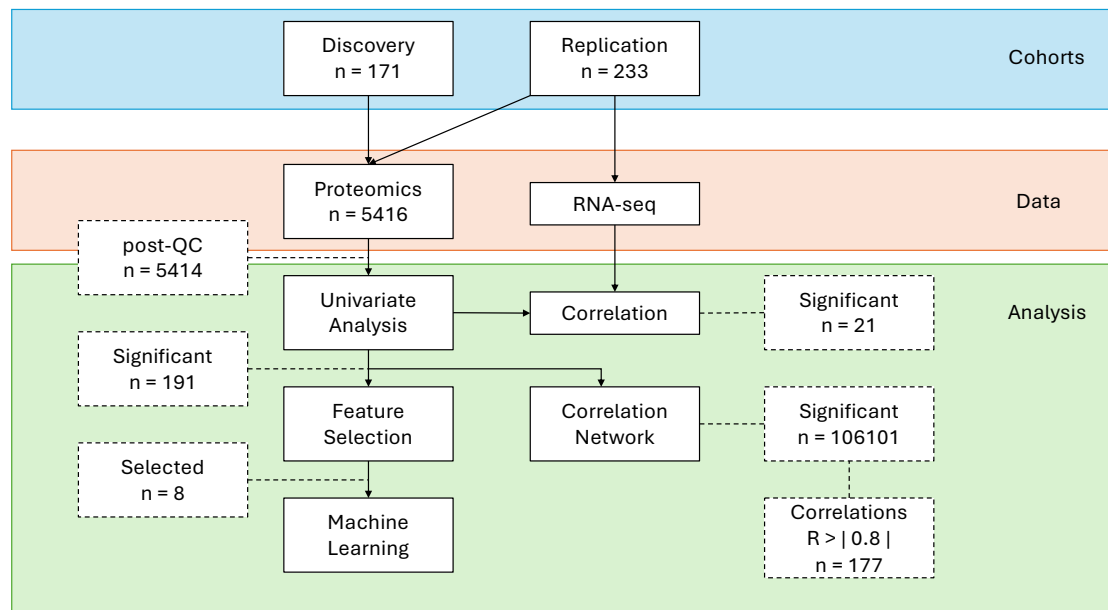

**Supplementary Figure 1:** Flowchart showing the use of the data and the major analysis steps taken.

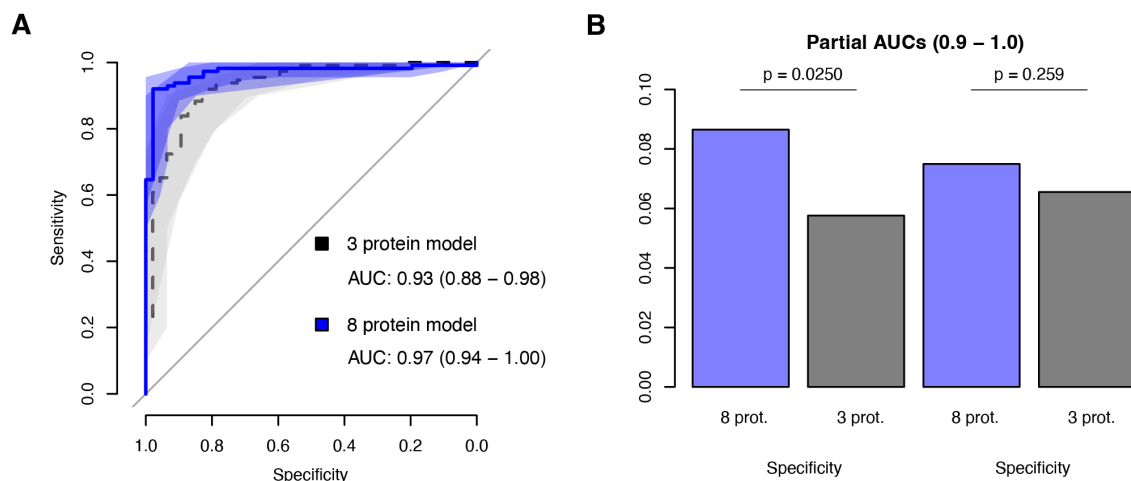

**Supplementary Figure 2:** Comparison between our previously developed 3-protein model<sup>1</sup> and the current 8-protein model. **A)** ROC-curves for separation of benign and malignant tumours. The shaded areas indicate 95% confidence intervals (CI) surrounding the point-estimate ROCs. The 8-protein model is shown with a solid black line with CIs in light blue and the 3-protein model with a dashed black line with CIs in light grey. The AUCs are written out with point-estimates and 95% confidence intervals. **B)** Comparisons of partial AUCs (pAUC) for sensitivity and specificity in the range of 0.9 to 1.0. The 8-protein model is shown in blue

the 3-protein model in grey. Maximum pAUC in the range is 0.1. The p-values above the bars is calculated based the DeLong's method (one-sided).

### **Supplementary References**

1. Ivansson, E. *et al.* Large-scale proteomics reveals precise biomarkers for detection of ovarian cancer in symptomatic women. *Scientific Reports* 2024 14:1 **14**, 1–9 (2024).
